# Supplementary material for: Adsorption and corrosion inhibition properties of N-{n-[1-R-5-(quinoxalin-6-yl)-4,5-dihydropyrazol-3-yl]phenyl}methanesulfonamides on mild steel in 1 M HCl: experimental and theoretical studies
Source: Royal Society of Chemistry journal article supplement (doi:10.1039/c6ra11373g), 2016-01-01
Supplement: c6ra11373g1.pdf [file c6ra11373g1.pdf]

## Supporting information

Adsorption and corrosion inhibition properties of N- $\{n$ -[1-*R*-5-(quinoxalin-6-yl)-4,5-dihydropyrazol-3-yl]phenyl}methanesulfonamides on mild steel in 1 M HCl: Experimental and theoretical studies

**Lukman O. Olasunkanmi,<sup>a,b,c</sup> Ime B. Obot,<sup>d</sup> Eno E. Ebenso<sup>a,b\*</sup>**

<sup>a</sup>*Department of Chemistry, School of Mathematics and Physical Sciences, Faculty of Agriculture, Science and Technology, North-West University (Mafikeng Campus) Private Bag X2046, Mmabatho 2735, South Africa.*

<sup>b</sup>*Material Science Innovation and Modelling (MaSIM) Research Focus Area, Faculty of Agriculture, Science and Technology, North-West University (Mafikeng Campus) Private Bag X2046, Mmabatho 2735, South Africa.*

<sup>c</sup>*Department of Chemistry, Faculty of Science, Obafemi Awolowo University, Ile-Ife, 220005, Nigeria.*

<sup>d</sup>*Centre of Research Excellence in Corrosion, Research Institute, King Fahd University of Petroleum and Minerals, Dhahran 31261, Kingdom of Saudi Arabia*

*\*Corresponding Author; E-mail: [Eno.Ebenso@nwu.ac.za](mailto:Eno.Ebenso@nwu.ac.za); Tel: +27 183892050/2051;  
Fax: +27183892052*

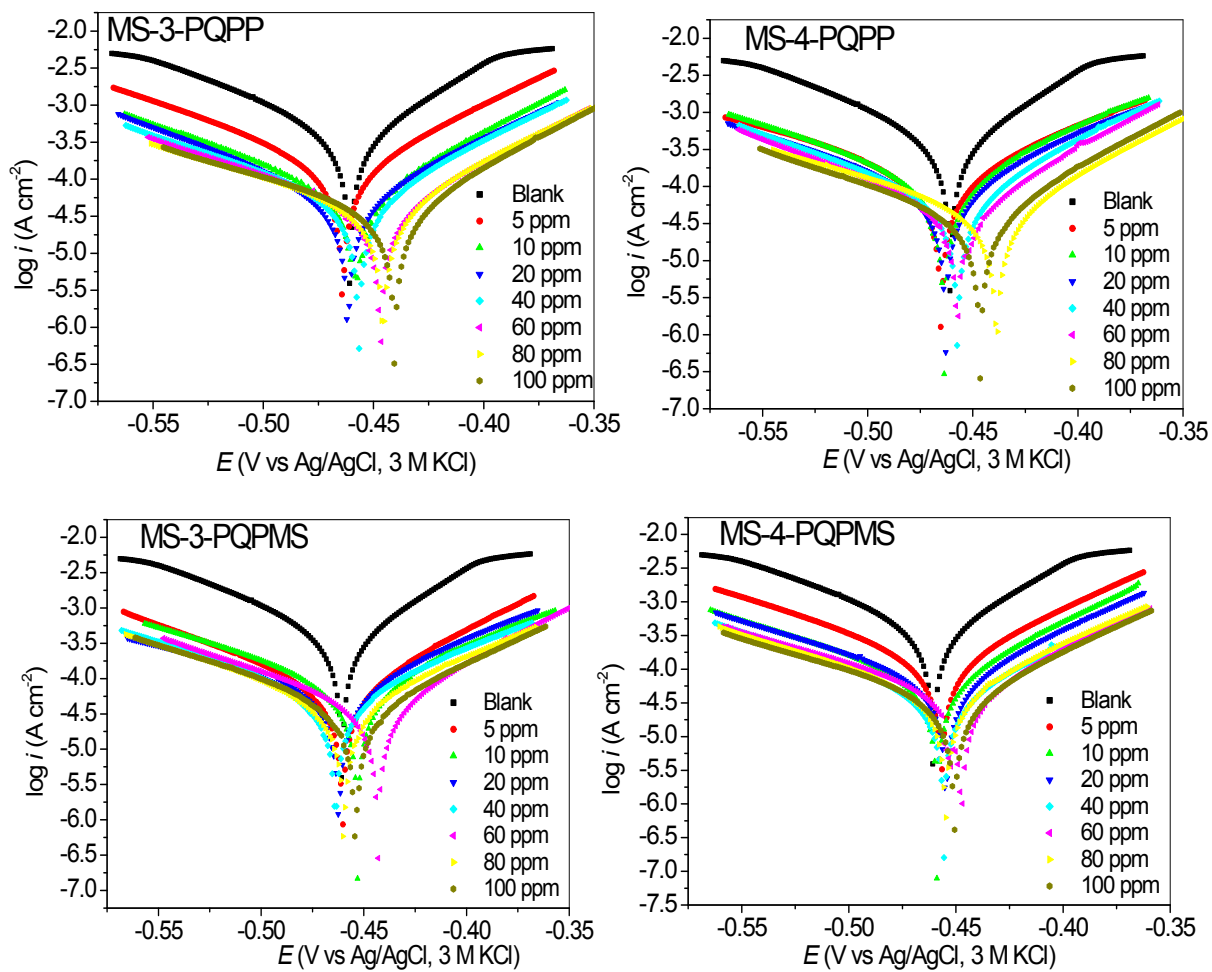

**Figure S1.** Tafel plots for mild steel in 1 M HCl without and with various concentrations of MS-3-PQPP, MS-4-PQPP, MS-3-PQPMS, and MS-4-PQPMS

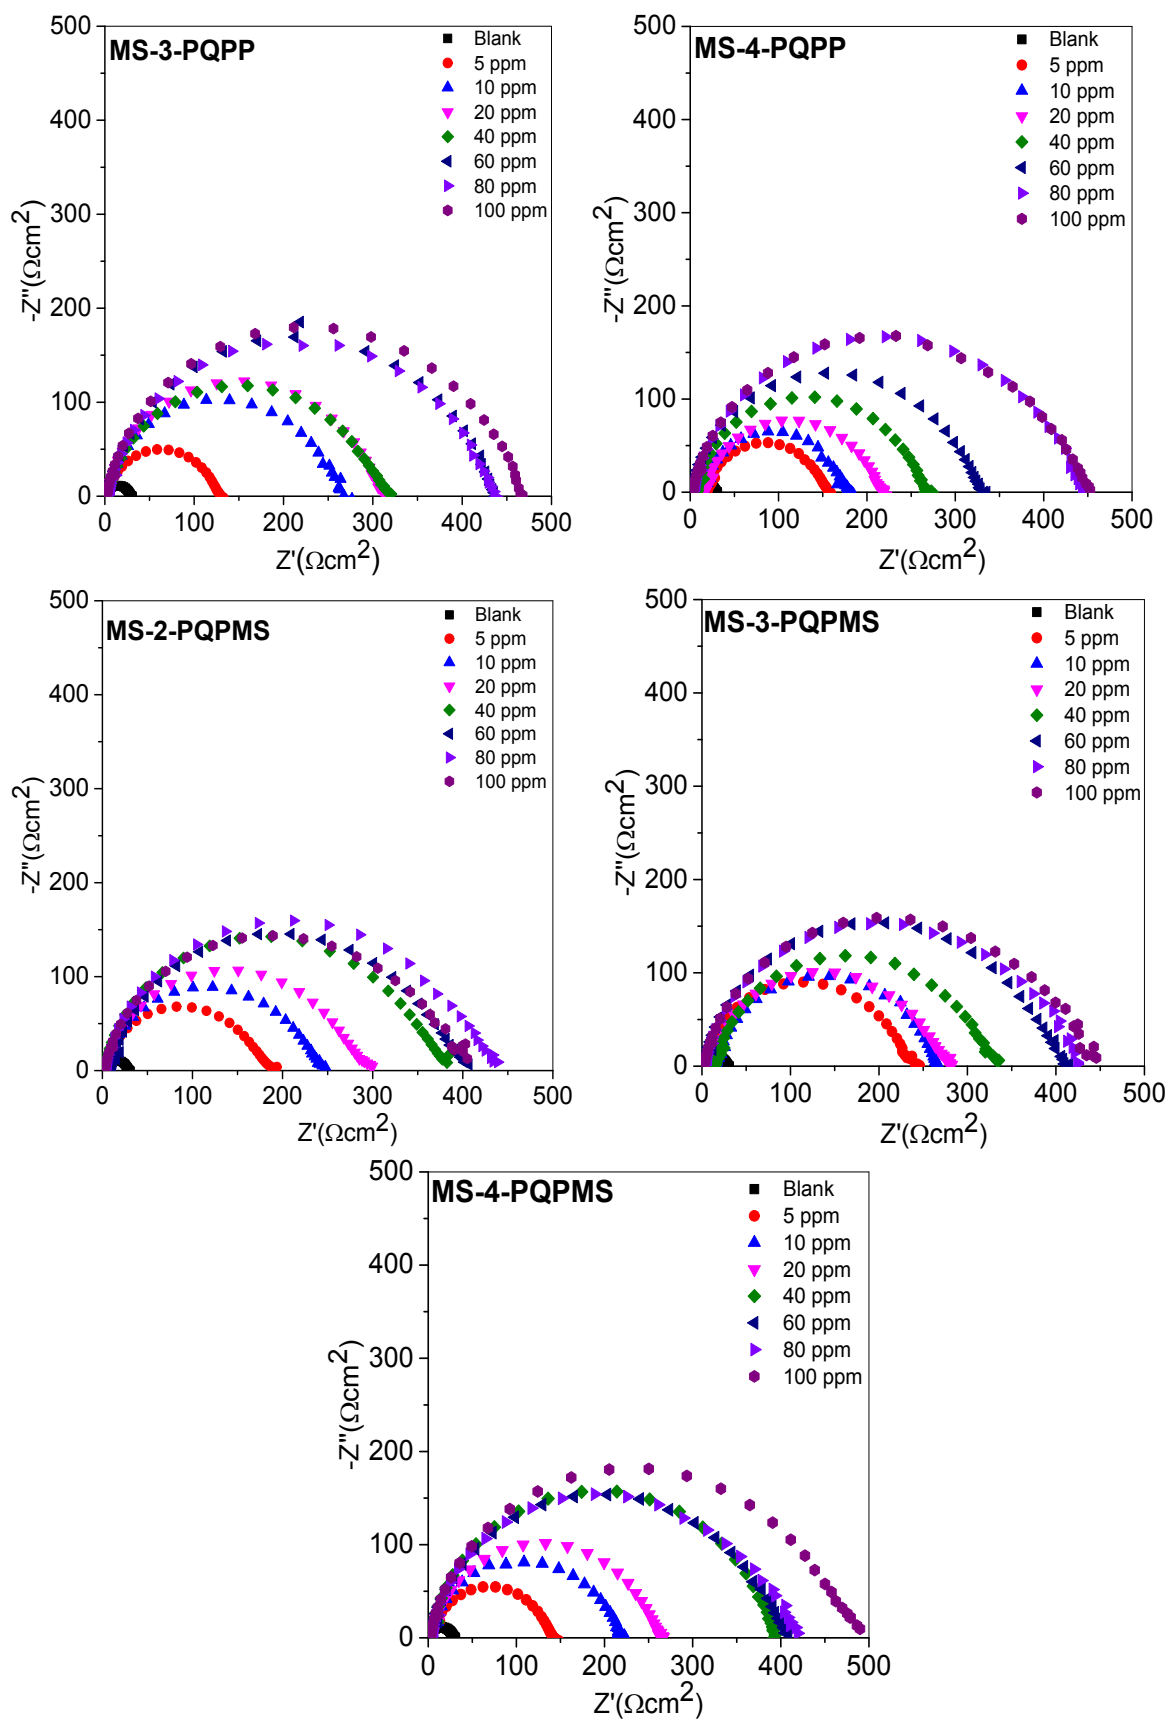

**Figure S2.** Nyquist plots for mild steel in 1 M HCl without and with various concentrations of MS-3-PQPP, MS-4-PQPP, MS-2-PQPMS, MS-3-PQPMS, and MS-4-PQPMS.

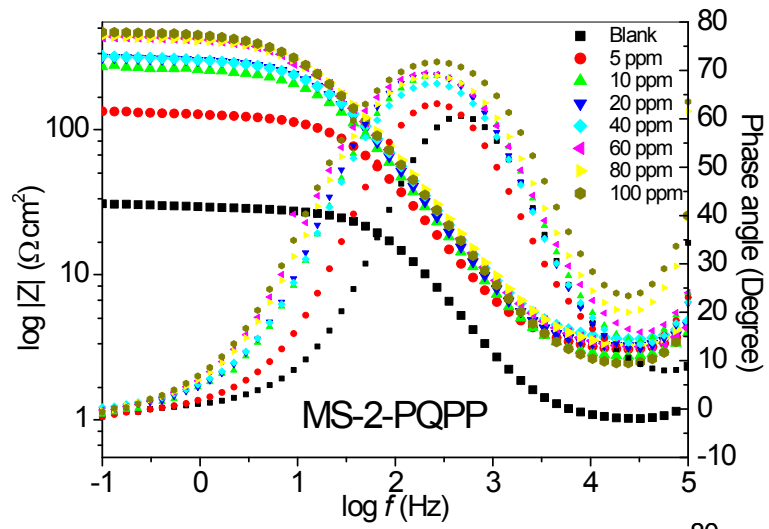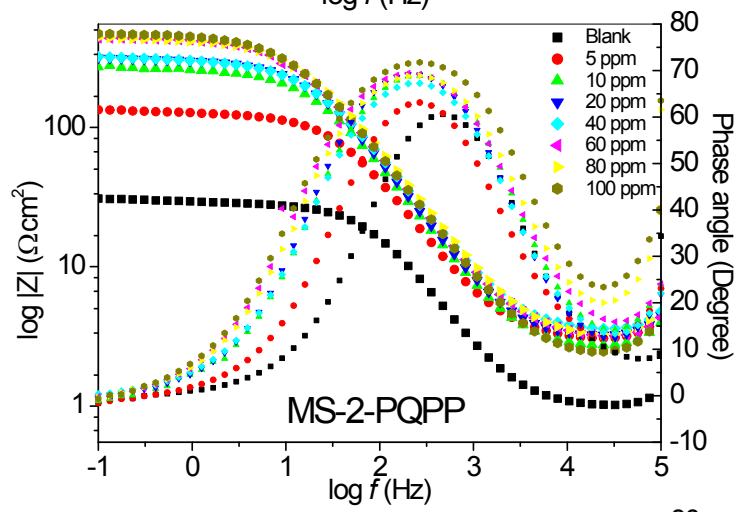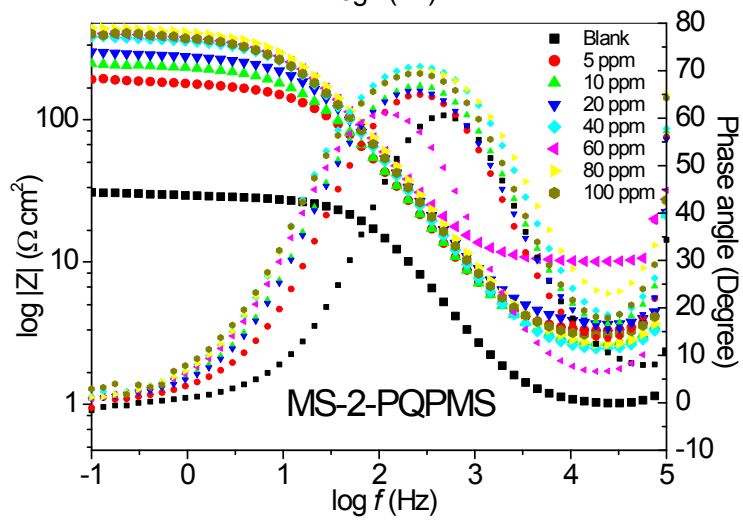

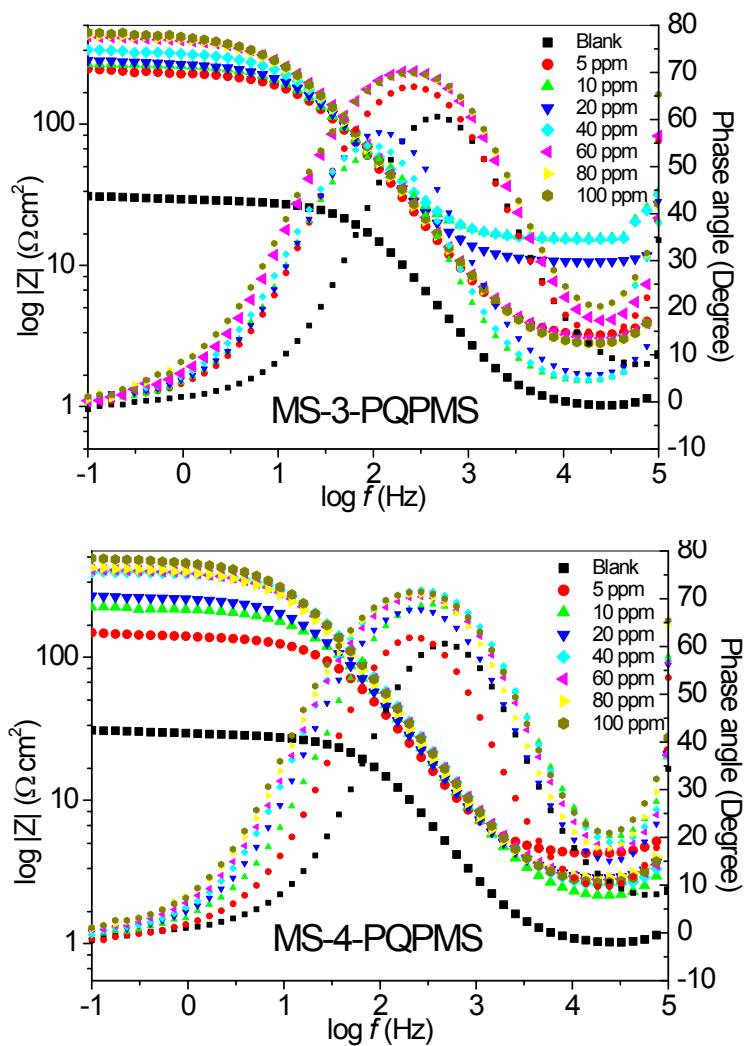

**Figure S3.** Bode plots for mild steel in 1 M HCl without and with various concentrations of MS-3-PQPP, MS-4-PQPP, MS-2-PQPMS, MS-3-PQPMS, and MS-4-PQPMS.

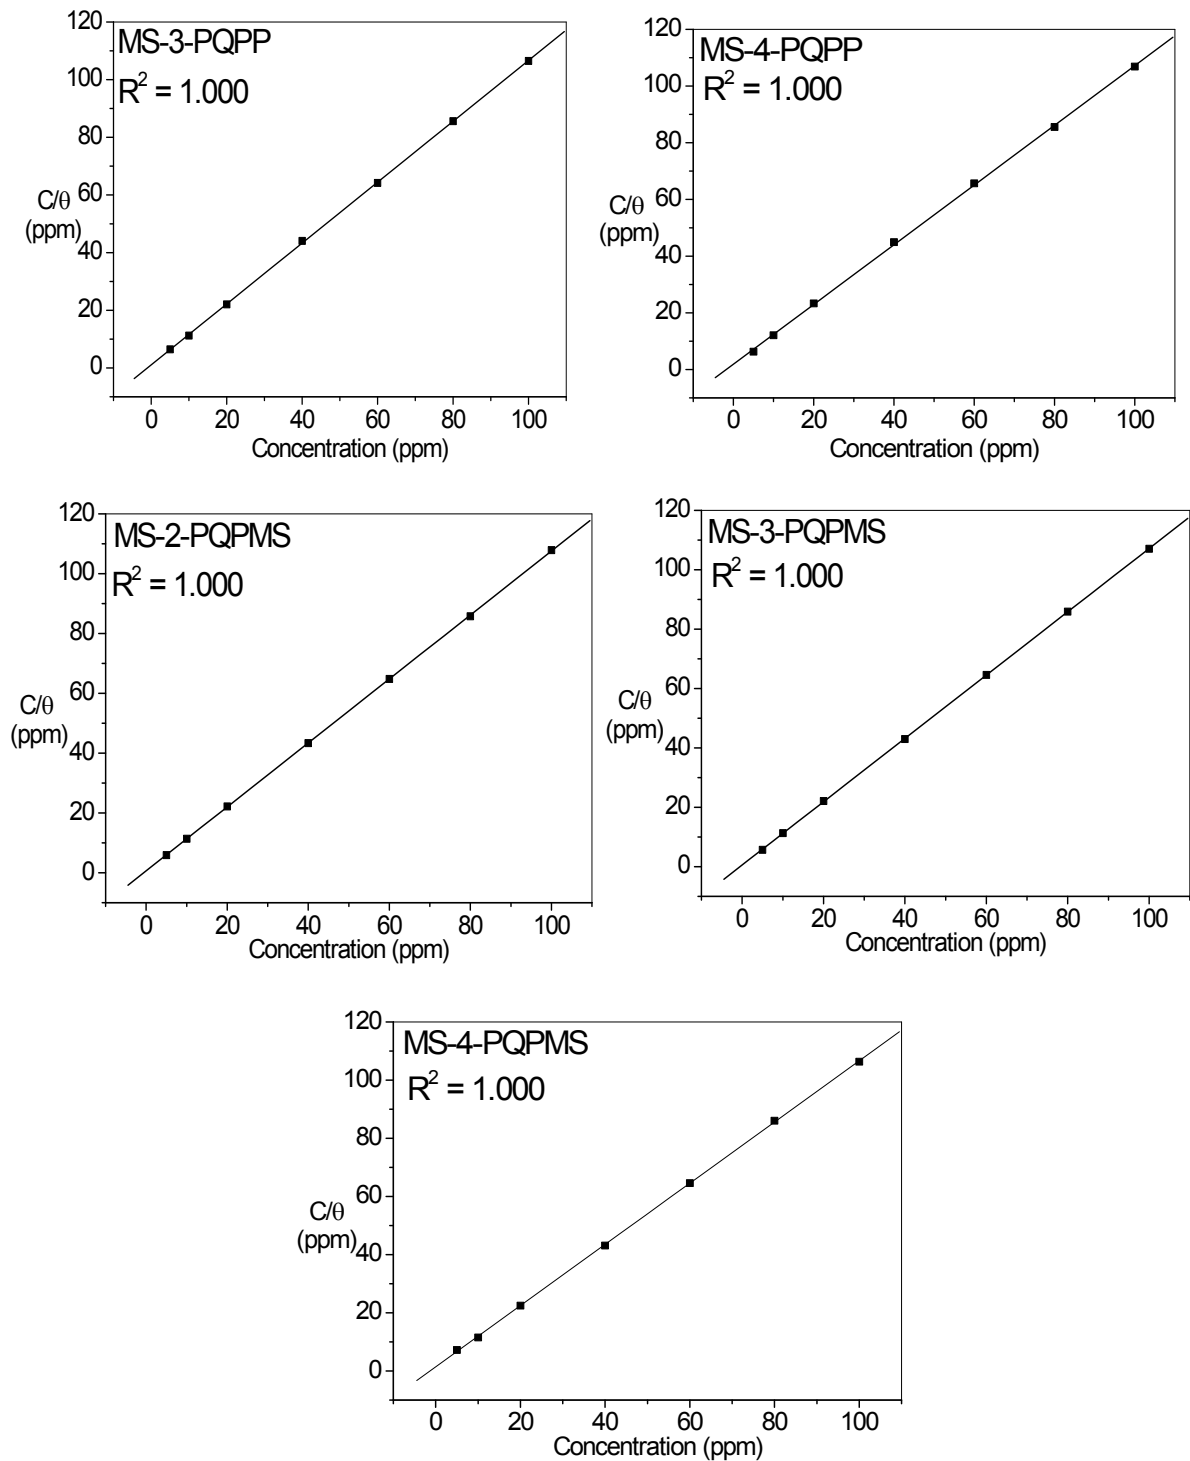

**Figure S4.** Langmuir adsorption isotherms for MS-3-PQPP, MS-4-PQPP, MS-2-PQPMS, MS-3-PQPMS, and MS-4-PQPMS on mild steel in 1 M HCl. (*Experimental data were taken from the EIS measurements.*)
